# Supplementary material for: Protein Phosphatase 1 Recruitment by Rif1 Regulates DNA Replication Origin Firing by Counteracting DDK Activity
Source: PubMed Central journal article supplement (PMC3989773; doi:10.1016/j.celrep.2014.02.019), 2014-03-20
Supplement: mmc1.pdf [file mmc1.pdf]

Cell Reports, Volume 7

Supplemental Information

**Protein Phosphatase 1 Recruitment by Rif1  
Regulates DNA Replication Origin Firing  
by Counteracting DDK Activity**

Anoushka Davé, Carol Cooley, Mansi Garg, and Alessandro Bianchi

# **Protein Phosphatase 1 recruitment by Rif1 regulates DNA replication origin firing by counteracting DDK activity**

Anoushka Davé, Carol Cooley, Mansi Garg and Alessandro Bianchi

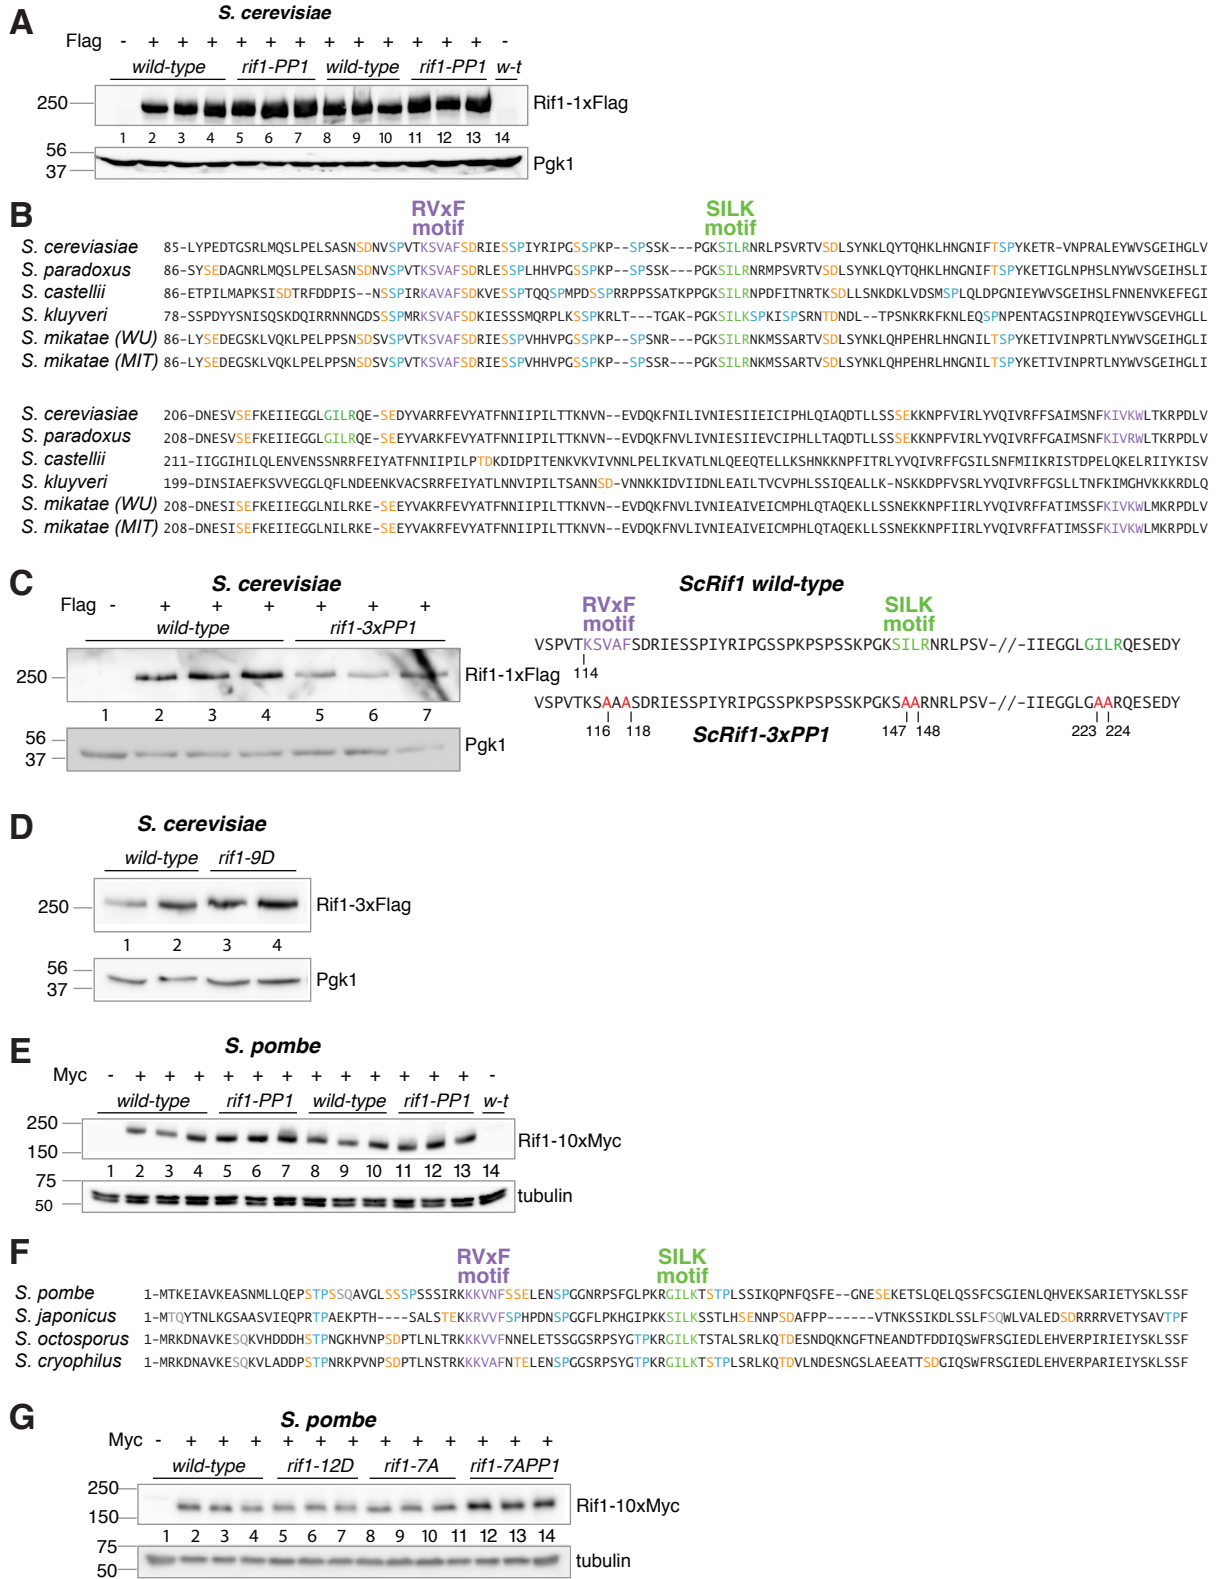

**Figure S1. Related to Figures 1 and 4.**  
**Expression levels of mutant Rif1 proteins.**

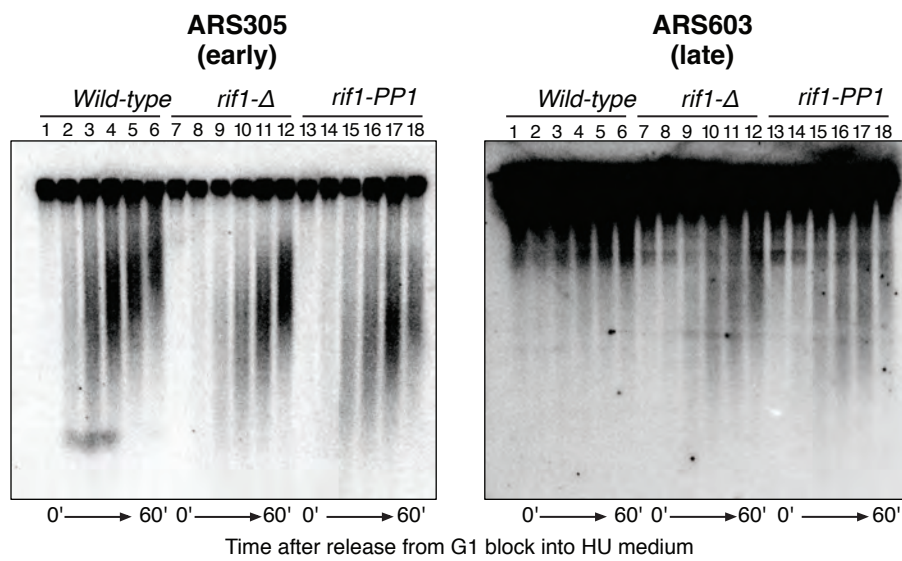

**Figure S2. Related to Figure 2.**  
 Loss of Rif1, or of Glc7 binding to Rif1, leads to early activation of late origin *ARS603*.

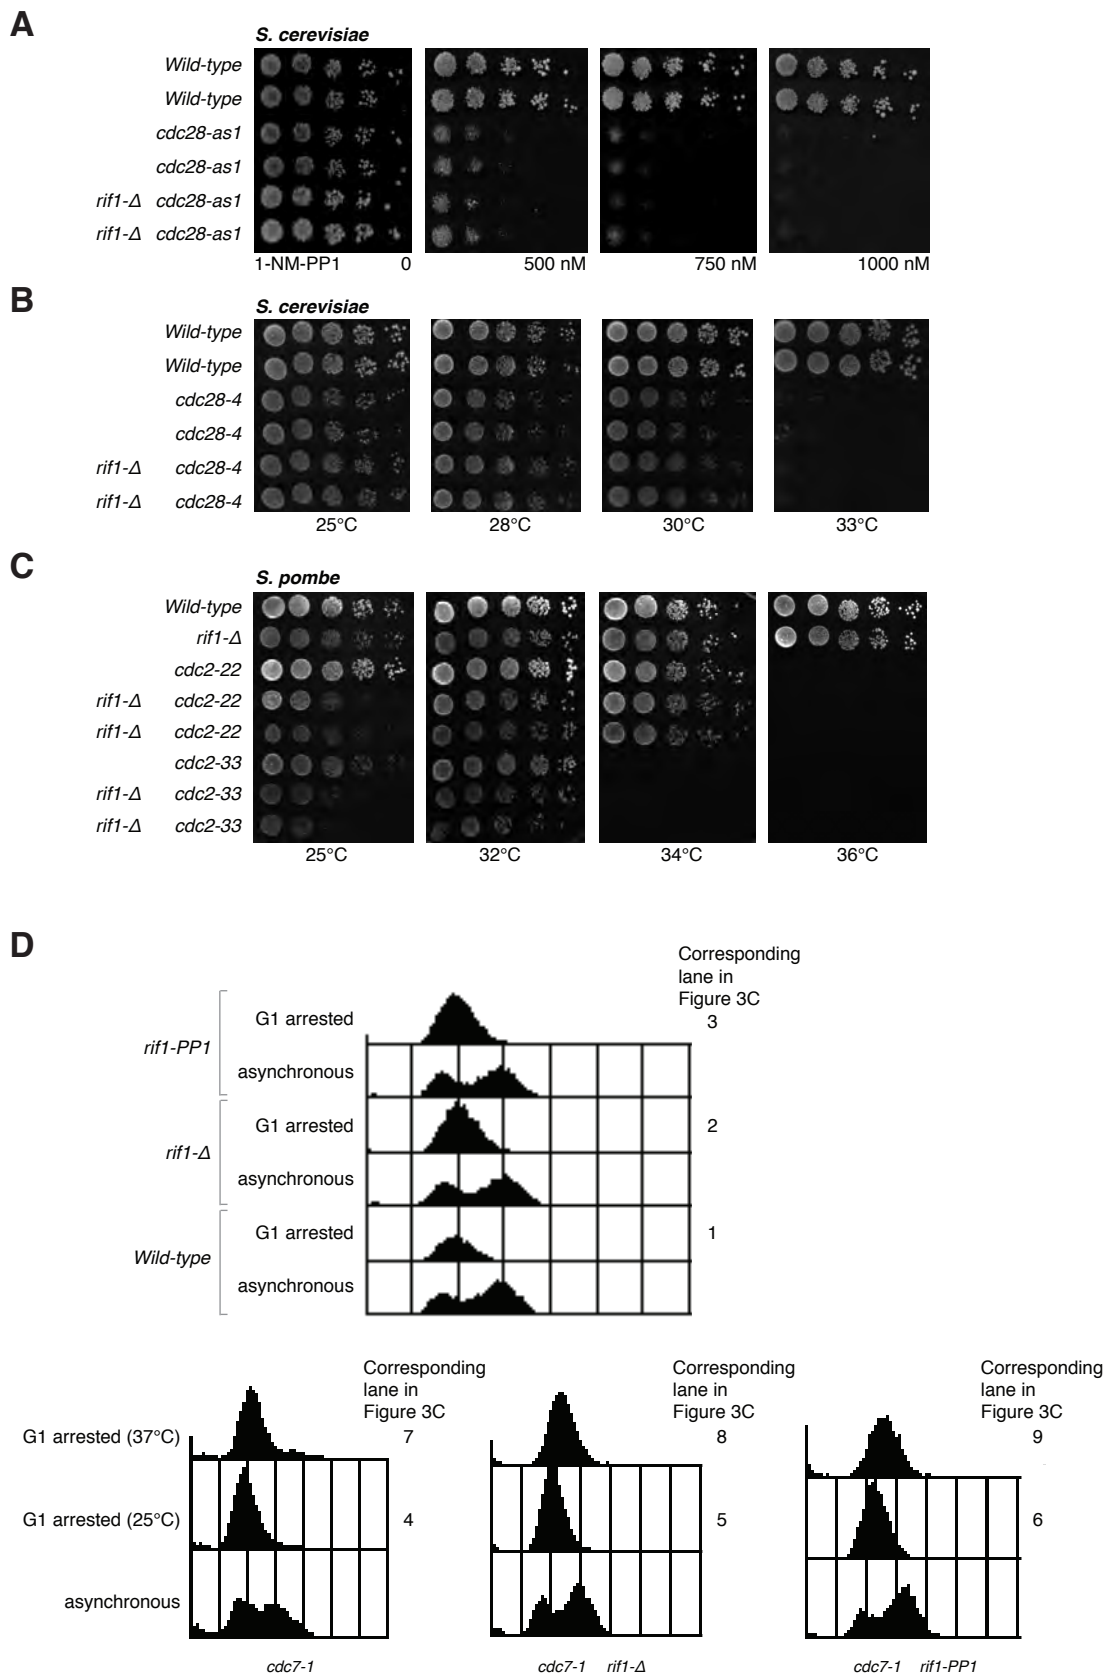

**Figure S3. Related to Figure 3.**

**A-C.** Loss of Rif1 does not suppress growth defect of several CDK alleles.

**D.** FACS analysis of samples from Figure 3C.

## Supplemental Figure Legends

### Figure S1. Expression levels of mutant Rif1 proteins. Related to Figure 1 and 4.

**A.** Analysis of protein levels of budding yeast wild-type Rif1 and Rif1-PP1 (referring to Figure 1) tagged at their C-terminus with 1 copy of the Flag epitope, from exponentially growing cultures. The same gel was also blotted for Pgk1, as a loading control. C-terminally tagged versions of the protein product of the *rif1-PP1* allele were found to be present at levels comparable to the wild-type tagged allele. **B.** Alignment of the relevant regions of Rif1 proteins from 5 *Saccharomyces* species (referring to Figure 4A). The RVxF and SILK type motifs are indicated in purple and green, respectively. Putative DDK sites are indicated in orange: these can be 'intrinsic' (SE/SD/TE/TD), or 'phosphorylation generated' where the negative charge C-terminal to the serine or threonine is provided by a prior phosphorylation event (for example by CDK). Finally, putative CDK sites are indicated in blue. **C.** Analysis of protein levels for the budding yeast Rif1 allele bearing changes to alanine at positions 116, 118, 147, 148, 223 and 224 (*rif1-3xPP1*). Although *S. cerevisiae* bears two additional SILK and RVxF type motifs further downstream from the first two (at positions 222 and 316), these putative motifs are embedded within the Ankyrin repeat region of the protein and are not well-conserved within the *Saccharomyces* genus. We found that the *rif1-3xPP1* allele (bearing mutations in the GILR motif at position 222 in addition to those within the first two motifs) was expressed at lower levels, possibly indicative of folding problems. **D.** Analysis of the protein levels of *S. cerevisiae* Rif1-9D, bearing the changes indicated in Figure 4A. **E.** Analysis of protein levels of fission yeast wild-type Rif1 and Rif1-PP1 (referring to Figure 1) tagged at their C-terminus with 10 copies of the Myc epitope, from exponentially growing cultures. The same gel was also blotted for tubulin, as a loading control. C-terminally tagged versions of the protein product of the *rif1-PP1* allele were found to be present at levels comparable to the wild-type tagged allele. **F.** Sequence alignment of the N-terminal region of the *rif1* gene in four *Schizosaccharomyces* species. RVxF (purple) and SILK (green) motifs, and putative DDK (orange) and CDK (blue) sites as above are indicated, in addition to Mec1/Tel1 sites

(grey). **G.** Analysis of the protein levels of *S. pombe* Rif1-12D, Rif1-7A, and Rif1-7APP1, bearing the changes indicated in Figure 4D.

**Figure S2. Loss of Rif1, or of Glc7 binding to Rif1, leads to early activation of late origin ARS603. Related to Figure 2.**

Analysis of DNA replication intermediates by alkaline agarose gel electrophoresis. Cells of the indicated genotypes from exponentially growing cultures in YPAD at 25°C were arrested in G1 phase of the cell cycle using 0.24 µM alpha-factor. The cells were then washed and released into S-phase in the presence of 200 mM HU, with time points harvested at 0, 20, 30, 40, 50 and 60 mins.

Replication intermediates were then separated on alkaline denaturing agarose gels and analyzed by southern blotting using probes for ARS305 (left panel) and ARS603 (right panel). Probes were generated by PCR using oligos DO1787/1788 and DO2498/2499 respectively.

**Figure S3. Loss of Rif1 does not suppress growth defect of several CDK alleles. Related to Figure 3.**

**A.** Analysis of the budding yeast *cdc28-as1* (analog-sensitive) allele in the absence of *RIF1*. 5-fold serial dilutions of log-phase cultures of budding yeast strains of the indicated genotypes were plated onto YPAD media with increasing concentrations of the ATP analog 1-NM-PP1. Plates were imaged following 2-day incubations. **B.** Analysis of the suppression of the temperature-sensitivity phenotype of the budding yeast *cdc28-4* allele in the absence of *RIF1*. 5-fold serial dilutions of log-phase cultures of budding yeast strains of the indicated genotypes were plated onto YPAD and incubated at temperatures ranging from 25°C to 33°C. Plates were incubated for two days and then imaged. **C.** Analysis of temperature sensitive alleles of fission yeast *cdc2* combined with *RIF1* deletion. 10-fold serial dilutions of log-phase cultures of the indicated genotypes were spotted on rich medium and incubated for 3 days at temperatures ranging from 25°C to 36°C. **D.** FACS analysis of samples in Figure 3C. Samples were harvested from the same cell cultures analysed by western

blotting in Figure 3C and fixed in 70% ethanol before being stained with Propidium iodide. The distribution of DNA content was then measured using FACS and the profiles aligned using Cell Quest software (Becton Dickinson).



Table S1. List of strains.

| Yeast         | Strain  | Figure                                          | Genotype                                                                                                       | Source         |
|---------------|---------|-------------------------------------------------|----------------------------------------------------------------------------------------------------------------|----------------|
| S. cerevisiae | YAB1661 | 1B, lanes 1, 2; 1D, 4C, lanes 1, 2              | MATa leu2 ura3 his3 GLC7-13myc::kanMX6                                                                         | Kelly Tatchell |
| S. cerevisiae | YAB1680 | 1B, lanes 11, 12; 4C, lanes 11, 12              | matc-D ade2-D leu2::Gal-HO::LEU2 lys2-D Pol2-13Myc::HIS3 bar1::matMX6 adh4::pAB942 mni2::LYS2 RIF1-FLAG::KANMX | This Study     |
| S. cerevisiae | YAB1782 | 1B, lanes 3, 7; 4C, lane 3, 7                   | MATa GLC7-13myc::kanMX6 RIF1-3xFLAG::URA3                                                                      | This Study     |
| S. cerevisiae | YAB1783 | 1B, lanes 4, 8; 4C, lane 4, 8                   | MATa GLC7-13myc::kanMX6 RIF1-3xFLAG::URA3                                                                      | This Study     |
| S. cerevisiae | YAB1784 | 1B, lanes 5, 9                                  | MATa GLC7-13myc::kanMX6 rif1-PP1-3xFLAG::URA3                                                                  | This Study     |
| S. cerevisiae | YAB1785 | 1B, lanes 6, 10                                 | MATa GLC7-13myc::kanMX6 rif1-PP1-3xFLAG::URA3                                                                  | This Study     |
| S. pombe      | BAF364  | 1C lanes 1, 2; 1E, 4F                           | h- ura4-D18 leu1-32 sds21-EGFPN::ura4                                                                          | Iain Hagan     |
| S. pombe      | BAF554  | 1C lanes 3, 5                                   | h- ura4-D18 leu1-32 sds21-EGFPN::ura4 his2- ade-                                                               | This Study     |
| S. pombe      | BAF558  | 1C lanes 4, 6                                   | h- sds21-EGFPN::ura4 rif1-PP1-10xMyc::leu1 ade6-216 ura4-D18 leu1-32                                           | This Study     |
| S. pombe      | BAF566  | 1C lanes 7, 8; 1E, 1F                           | h- ura4-D18 leu1-32 dis2-NEGFP::ura4                                                                           | Iain Hagan     |
| S. pombe      | BAF556  | 1C lanes 9, 11                                  | h- ura4-D18 leu1-32 dis2-NEGFP::ura4 rif1-10xMyc::leu1                                                         | This Study     |
| S. pombe      | BAF561  | 1C lanes 10, 12                                 | h- dis2-NEGFP::ura4 rif1-PP1-10xMyc::leu1 ade6-216 his3-D1 ura4-D18 leu1-32                                    | This Study     |
| S. pombe      | BAF552  | 1C lanes 13, 14; S1G, lane2                     | h- rif1-10xMyc::leu1 ade6-216 his3-D1 ura4-D18 leu1-32                                                         | This Study     |
| S. cerevisiae | YAB1709 | 1D                                              | MATa GLC7-13myc::kanMX6 rif1-PP1                                                                               | This Study     |
| S. cerevisiae | YAB1710 | 1D                                              | MATa GLC7-13myc::kanMX6 rif1-PP1                                                                               | This Study     |
| S. cerevisiae | YAB1711 | 1D                                              | MATa GLC7-13myc::kanMX6 rif1-PP1                                                                               | This Study     |
| S. cerevisiae | YAB1712 | 1D                                              | MATa GLC7-13myc::kanMX6 rif1::URA3                                                                             | This Study     |
| S. cerevisiae | YAB1714 | 1D                                              | MATa GLC7-13myc::kanMX6 rif1::URA3                                                                             | This Study     |
| S. cerevisiae | YAB1715 | 1D                                              | MATa GLC7-13myc::kanMX6 rif1::URA3                                                                             | This Study     |
| S. pombe      | BAF365  | 1E                                              | h- ura4-D18 leu1-32 sds21-EGFPN::ura4 his2- ade-                                                               | Iain Hagan     |
| S. pombe      | BAF407  | 1E; 4F                                          | h- sds21-EGFPN::ura4 rif1-PP1 ade6-216 ura4-D18 leu1-32                                                        | This Study     |
| S. pombe      | BAF409  | 1E                                              | h- sds21-EGFPN::ura4 Rif1::bsd ura4-D18 leu1-32                                                                | This Study     |
| S. pombe      | BAF410  | 1E                                              | h- sds21-EGFPN::ura4 Rif1::bsd ade6-704 ura4-D18 leu1-32                                                       | This Study     |
| S. pombe      | BAF411  | 1E                                              | h- sds21-EGFPN::ura4 Rif1::bsd ade6-704 ura4-D18 leu1-32                                                       | This Study     |
| S. pombe      | BAF408  | 1F                                              | h- dis2-NEGFP::ura4 rif1-PP1 ade6-216 his3-D1 ura4-D18 leu1-32                                                 | This Study     |
| S. pombe      | BAF412  | 1F                                              | h- dis2-NEGFP::ura4 Rif1::bsd ade6-704 ura4-D18 leu1-32 nr1                                                    | This Study     |
| S. pombe      | BAF415  | 1F                                              | h- dis2-NEGFP::ura4 Rif1::bsd ade6-704 ura4-D18 leu1-32 nr2                                                    | This Study     |
| S. pombe      | BAF494  | 1F                                              | h- dis2-NEGFP::ura4 sds21::LEU2 ade6-216 his3-D1 ura4-D18 leu1-32                                              | This Study     |
| S. pombe      | BAF495  | 1F                                              | h- dis2-NEGFP::ura4 sds21::LEU2 ade6-216 ura4-D18 leu1-32                                                      | This Study     |
| S. pombe      | BAF496  | 1F                                              | h- dis2-NEGFP::ura4 sds21::LEU2 ura4-D18 leu1-32                                                               | This Study     |
| S. pombe      | BAF497  | 1F                                              | h- dis2-NEGFP::ura4 sds21::LEU2 ade6-216 ura4-D18 leu1-32                                                      | This Study     |
| S. cerevisiae | YAB1409 | 2A, left panels; 2B; S1A, lane 1, 14            | matc-D ade2-D leu2::Gal-HO::LEU2 lys2-D Pol2-13Myc::HIS3 bar1::matMX6 adh4::pAB942 mni2::LYS2                  | This Study     |
| S. cerevisiae | YAB1410 | 2A, left panels                                 | matc-D ade2-D leu2::Gal-HO::LEU2 lys2-D Pol2-13Myc::HIS3 bar1::matMX6 adh4::pAB704 mni2::LYS2                  | This Study     |
| S. cerevisiae | YAB1689 | 2A, center panels; 2B                           | matc-D ade2-D leu2::Gal-HO(LEU2) lys2-D Pol2-13Myc::HIS3 adh4::pAB942 mni2::LYS2 rif1-PP1                      | This Study     |
| S. cerevisiae | YAB1706 | 2A, center panels                               | matc-D ade2-D leu2::Gal-HO(LEU2) lys2-D Pol2-13Myc::HIS3 adh4::pAB704 mni2::LYS2 rif1-PP1                      | This Study     |
| S. cerevisiae | YAB1713 | 2A, center panels; 2B                           | matc-D ade2-D leu2::Gal-HO(LEU2) lys2-D Pol2-13Myc::HIS3 bar1::matMX6 adh4::pAB942 mni2::LYS2 rif1-PP1         | This Study     |
| S. cerevisiae | YAB1618 | 2A, right panels; 2B                            | matc-D ade2-D leu2::Gal-HO(LEU2) lys2-D Pol2-13Myc::HIS3 bar1::matMX6 adh4::pAB942 mni2::LYS2 rif1::TRP1       | This Study     |
| S. pombe      | BAF392  | 2C                                              | h- cdc25-22 cdc20-GFP::KanMX6 ura4-D18 leu1-32 ade6-216                                                        | This Study     |
| S. pombe      | BAF395  | 2C                                              | h- cdc25-22 cdc20-GFP::KanMX6 rif1-PP1 ura4-D18                                                                | This Study     |
| S. pombe      | BAF396  | 2C                                              | h- cdc25-22 cdc20-GFP::KanMX6 rif1-PP1 ura4-D18                                                                | This Study     |
| S. pombe      | BAF401  | 2C                                              | h- rif1::bsd cdc25-22 cdc20-GFP::KanMX6 ade6-704 ura4-D18 leu1-32                                              | This Study     |
| S. pombe      | BAF463  | 2C                                              | h- sds21::LEU2 cdc25-22 cdc20-GFP::KanMX6 ade6-216 his3-D1 ura4-D18 leu1-32                                    | This Study     |
| S. cerevisiae | YAB41   | 3A                                              | MATa cdc7-1                                                                                                    | Lab collection |
| S. cerevisiae | YAB1739 | 3A                                              | MATa cdc7-1 rif1-PP1                                                                                           | This Study     |
| S. cerevisiae | YAB1740 | 3A                                              | MATa cdc7-1 rif1-PP1                                                                                           | This Study     |
| S. cerevisiae | YAB1748 | 3A                                              | MATa cdc7-1 rif1::TRP1                                                                                         | This Study     |
| S. cerevisiae | YAB0    | 3A, S1C, lane 1; S2, lanes 1-6 both panels; S3B | MATa                                                                                                           | This Study     |
| S. cerevisiae | YAB1803 | 3A; S2, lane 7-13 both panels                   | MATa rif1::TRP1                                                                                                | Lab collection |
| S. cerevisiae | YAB1697 | 3A; S2, lanes 13-18 both panels                 | MATa rif1-PP1                                                                                                  | This Study     |
| S. pombe      | BAF59   | 3B; S3C                                         | h- rif1::bsd ade6-704 ura4-D18 leu1-32                                                                         | This Study     |
| S. pombe      | BAF394  | 3B                                              | h- rif1-PP1 ade6-216 his3-D1 ura4-D18 leu1-32                                                                  | This Study     |
| S. pombe      | BAF400  | 3B; 4E                                          | h- hsk1-89::ura4 ura4-D18 leu1-32                                                                              | Tony Carr      |
| S. pombe      | BAF464  | 3B; 4E                                          | h- rif1::bsd hsk1-89::ura4 ura4-D18 leu1-32                                                                    | This Study     |
| S. pombe      | BAF484  | 3B; 4E                                          | h- rif1-PP1 hsk1-89::ura4 ura4-D18 leu1-32                                                                     | This Study     |
| S. pombe      | BAF6    | 3B; S1E; S1G; S3C                               | h- ade6-216 his3-D1 ura4-D18 leu1-32                                                                           | This Study     |
| S. cerevisiae | YAB1799 | 3C, lane 1; S3D                                 | MATa mcm4-1xFlag::kanMX                                                                                        | This Study     |
| S. cerevisiae | YAB1805 | 3C, lane 2; S3D                                 | MATa Rif1::TRP1 Mcm4-1xFlag::kanMX                                                                             | This Study     |
| S. cerevisiae | YAB1801 | 3C, lane 3; S3D                                 | MATa rif1-PP1 mcm4-1xFlag::kanMX                                                                               | This Study     |
| S. cerevisiae | YAB1913 | 3C, lane 4, 7; S3D                              | MATa cdc7-1 mcm4-1xFlag::kanMX                                                                                 | This Study     |

|               |         |                              |                                                                                                                             |                 |
|---------------|---------|------------------------------|-----------------------------------------------------------------------------------------------------------------------------|-----------------|
| S. cerevisiae | YAB1888 | 3C, lane 5, 8, S3D           | MATα cdc7-1 Rfl1::TRP1 Mcm4-1xFlag::kanMX                                                                                   | This Study      |
| S. cerevisiae | YAB1904 | 3C, lane 6, 9, S3D           | MATα cdc7-1 rfl1-PP1 mcm4-1xflag::kanMX                                                                                     | This Study      |
| S. cerevisiae | YAB1902 | 4B                           | MATα rfl1-9D                                                                                                                | This Study      |
| S. cerevisiae | YAB1832 | 4B                           | MATα cdc7-1 rfl1-9D                                                                                                         | This Study      |
| S. cerevisiae | YAB1834 | 4B                           | MATα cdc7-1 rfl1-9D                                                                                                         | This Study      |
| S. cerevisiae | YAB1875 | 4C                           | MATα GLC7-13myc::kanMX6 rfl1-9D-3xFLAG::URA3                                                                                | This Study      |
| S. cerevisiae | YAB1877 | 4C                           | MATα GLC7-13myc::kanMX6 rfl1-9D-3xFLAG::URA3                                                                                | This Study      |
| S. pombe      | BAF548  | 4E                           | h+ rfl1-12D ade6-216 his3-D1 ura4-D18 leu1-32                                                                               | This Study      |
| S. pombe      | BAF550  | 4E                           | h+ rfl1-7A ade6-216 his3-D1 ura4-D18 leu1-32                                                                                | This Study      |
| S. pombe      | BAF551  | 4E                           | h+ rfl1-7APP1 ade6-216 his3-D1 ura4-D18 leu1-32                                                                             | This Study      |
| S. pombe      | BAF604  | 4E                           | h- hsk1-89:ura4 rfl1-12D ade6-216 ura4-D18 leu1-32                                                                          | This Study      |
| S. pombe      | BAF605  | 4E                           | h- hsk1-89:ura4 rfl1-12D his3-D1 ura4-D18 leu1-32                                                                           | This Study      |
| S. pombe      | BAF606  | 4E                           | h- hsk1-89:ura4 rfl1-7A his3-D1 ura4-D18 leu1-32                                                                            | This Study      |
| S. pombe      | BAF607  | 4E                           | h+ hsk1-89:ura4 rfl1-7A ade6-216 his3-D1 ura4-D18 leu1-32                                                                   | This Study      |
| S. pombe      | BAF608  | 4E                           | h- hsk1-89:ura4 rfl1-7APP1 ura4-D18 leu1-32                                                                                 | This Study      |
| S. pombe      | BAF609  | 4E                           | h+ hsk1-89:ura4 rfl1-7APP1 ade6-216 his3-D1 ura4-D18 leu1-32                                                                | This Study      |
| S. pombe      | BAF621  | 4F                           | h- sds21-EGFPN::ura4 rfl1-12D ade6-216 his3-D1 ura4-D18 leu1-32                                                             | This Study      |
| S. pombe      | BAF622  | 4F                           | h- sds21-EGFPN::ura4 rfl1-12D ura4-D18 leu1-32                                                                              | This Study      |
| S. pombe      | BAF624  | 4F                           | h- sds21-EGFPN::ura4 rfl1-7A his3-D1 ura4-D18 leu1-32                                                                       | This Study      |
| S. pombe      | BAF625  | 4F                           | h+ sds21-EGFPN::ura4 rfl1-7APP1 his3-D1 ura4-D18 leu1-32                                                                    | This Study      |
| S. pombe      | BAF626  | 4F                           | h- sds21-EGFPN::ura4 rfl1-7APP1 ade6-216 ura4-D18 leu1-32                                                                   | This Study      |
| S. cerevisiae | YAB1703 | S1A, lane 11                 | matG-D ade2-D leu2::Gal-HO::LEU2 lys2-D Pol2-13Myc::HIS3 bar1::matMX6 adh4::pAB942 mni2::LYS2 RIF1-1xFLAG::kanMX rfl1-PP1   | This Study      |
| S. cerevisiae | YAB1704 | S1A, lane 12                 | matG-D ade2-D leu2::Gal-HO::LEU2 lys2-D Pol2-13Myc::HIS3 bar1::matMX6 adh4::pAB942 mni2::LYS2 RIF1-1xFLAG::kanMX rfl1-PP1   | This Study      |
| S. cerevisiae | YAB1705 | S1A, lane 13                 | matG-D ade2-D leu2::Gal-HO::LEU2 lys2-D Pol2-13Myc::HIS3 bar1::matMX6 adh4::pAB942 mni2::LYS2 RIF1-1xFLAG::kanMX rfl1-PP1   | This Study      |
| S. cerevisiae | YAB1678 | S1A, lane 2-4; S1C, lane 2-4 | matG-D ade2-D leu2::Gal-HO::LEU2 lys2-D Pol2-13Myc::HIS3 bar1::matMX6 adh4::pAB942 mni2::LYS2 RIF1-1xFLAG::kanMX            | This Study      |
| S. cerevisiae | YAB1700 | S1A, lane 5                  | matG-D ade2-D leu2::Gal-HO::LEU2 lys2-D Pol2-13Myc::HIS3 bar1::matMX6 adh4::pAB942 mni2::LYS2 RIF1-1xFLAG::kanMX rfl1-PP1   | This Study      |
| S. cerevisiae | YAB1701 | S1A, lane 6                  | matG-D ade2-D leu2::Gal-HO::LEU2 lys2-D Pol2-13Myc::HIS3 bar1::matMX6 adh4::pAB942 mni2::LYS2 RIF1-1xFLAG::kanMX rfl1-PP1   | This Study      |
| S. cerevisiae | YAB1702 | S1A, lane 7                  | matG-D ade2-D leu2::Gal-HO::LEU2 lys2-D Pol2-13Myc::HIS3 bar1::matMX6 adh4::pAB942 mni2::LYS2 RIF1-1xFLAG::kanMX rfl1-PP1   | This Study      |
| S. cerevisiae | YAB1679 | S1A, lane 8-10               | matG-D ade2-D leu2::Gal-HO::LEU2 lys2-D Pol2-13Myc::HIS3 bar1::matMX6 adh4::pAB942 mni2::LYS2 RIF1-1xFLAG::kanMX            | This Study      |
| S. cerevisiae | YAB1681 | S1C, lane 5                  | matG-D ade2-D leu2::Gal-HO::LEU2 lys2-D Pol2-13Myc::HIS3 bar1::matMX6 adh4::pAB942 mni2::LYS2 RIF1-1xFLAG::kanMX rfl1-3xPP1 | This Study      |
| S. cerevisiae | YAB1682 | S1C, lane 6                  | matG-D ade2-D leu2::Gal-HO::LEU2 lys2-D Pol2-13Myc::HIS3 bar1::matMX6 adh4::pAB942 mni2::LYS2 RIF1-1xFLAG::kanMX rfl1-3xPP1 | This Study      |
| S. cerevisiae | YAB1683 | S1C, lane 7                  | matG-D ade2-D leu2::Gal-HO::LEU2 lys2-D Pol2-13Myc::HIS3 bar1::matMX6 adh4::pAB942 mni2::LYS2 RIF1-1xFLAG::kanMX rfl1-3xPP1 | This Study      |
| S. cerevisiae | YAB1843 | S1D, lane 1                  | MATα Rfl1-3Flag                                                                                                             | This Study      |
| S. cerevisiae | YAB1844 | S1D, lane 2                  | MATα Rfl1-3Flag                                                                                                             | This Study      |
| S. cerevisiae | YAB1841 | S1D, lane 3                  | MATα Rfl1-3Flag, rfl1-9D                                                                                                    | This Study      |
| S. cerevisiae | YAB1842 | S1D, lane 4                  | MATα Rfl1-3Flag, rfl1-9D                                                                                                    | This Study      |
| S. pombe      | BAF486  | S1E                          | h+ rfl1-10xMyc::ura4 ade6-216 his3-D1 ura4-D18 leu1-32                                                                      | This Study      |
| S. pombe      | BAF487  | S1E                          | h+ rfl1-PP1-10xMyc::ura4 ade6-216 his3-D1 ura4-D18 leu1-32                                                                  | This Study      |
| S. pombe      | BAF488  | S1E                          | h+ rfl1-PP1-10xMyc::ura4 ade6-216 his3-D1 ura4-D18 leu1-32                                                                  | This Study      |
| S. pombe      | BAF489  | S1E                          | h+ rfl1-PP1-10xMyc::ura4 ade6-216 his3-D1 ura4-D18 leu1-32                                                                  | This Study      |
| S. pombe      | BAF490  | S1E                          | h+ rfl1-PP1-10xMyc::ura4 ade6-216 his3-D1 ura4-D18 leu1-32                                                                  | This Study      |
| S. pombe      | BAF491  | S1E                          | h+ rfl1-PP1-10xMyc::ura4 ade6-216 his3-D1 ura4-D18 leu1-32                                                                  | This Study      |
| S. pombe      | BAF492  | S1E                          | h+ rfl1-PP1-10xMyc::ura4 ade6-216 his3-D1 ura4-D18 leu1-32                                                                  | This Study      |
| S. pombe      | BAF553  | S1G, lane 3, 4               | h+ rfl1-10xMyc::leu1 ade6-216 his3-D1 ura4-D18 leu1-32                                                                      | This Study      |
| S. pombe      | BAF618  | S1G, lane 5, 6, 7            | h+ rfl1-12D-10xMyc::leu1 ade6-216 his3-D1 ura4-D18 leu1-32                                                                  | This Study      |
| S. pombe      | BAF619  | S1G, lane 8, 9, 10           | h+ rfl1-7A-10xMyc::leu1 ade6-216 his3-D1 ura4-D18 leu1-32                                                                   | This Study      |
| S. pombe      | BAF620  | S1G, lane 11, 12, 13         | h+ rfl1-7APP1-10xMyc::leu1 ade6-216 his3-D1 ura4-D18 leu1-32                                                                | This Study      |
| S. cerevisiae | YAB1910 | S3A                          | SK1 MATα ho::LYS2 lys2 ura3::hisG his3::hisG trp1::hisG                                                                     | Hideo Isubouchi |
| S. cerevisiae | YAB1847 | S3A                          | SK1 MATα ho::LYS2 lys2 ura3 arg4::nsp leu2::hisG cdc28as1                                                                   | Matt Neale      |
| S. cerevisiae | YAB1900 | S3A                          | SK1 MATα ho::LYS2 lys2 ura3 arg4::nsp leu2::hisG cdc28as1                                                                   | This Study      |
| S. cerevisiae | YAB1868 | S3B                          | MATα cdc28-4                                                                                                                | Jorrit Enserink |
| S. cerevisiae | YAB1914 | S3B                          | MATα cdc28-4                                                                                                                | This Study      |
| S. cerevisiae | YAB1914 | S3B                          | MATα cdc28-4 rfl1::TRP1                                                                                                     | This Study      |
| S. pombe      | BAF591  | S3C                          | h- cdc2-22                                                                                                                  | Tony Carr       |
| S. pombe      | BAF612  | S3C                          | h+ cdc2-22 rfl1::bsd ura4-D18 leu1-32                                                                                       | This Study      |
| S. pombe      | BAF613  | S3C                          | h- cdc2-22 rfl1::bsd ade6-704 ura4-D18                                                                                      | This Study      |
| S. pombe      | BAF590  | S3C                          | h- cdc2-33 ade6-704 leu1-32 ura4-D18                                                                                        | Tony Carr       |
| S. pombe      | BAF614  | S3C                          | h- cdc2-33 ade6-704 ura4-D18 leu1-32                                                                                        | This Study      |
| S. pombe      | BAF615  | S3C                          | h+ cdc2-33 ade6-704 ura4-D18 leu1-32                                                                                        | This Study      |

NOTES: In the strains bearing the Gal-HO cassette there is no HO site in the genome (the endogenous site at the MAT locus has been deleted) and therefore no HO cleavage is induced, and no effect on cell cycle progress is elicited. pAB942 introduces an ADE2 marker and a stretch of telomeric repeats at the subtelomere of VII-L, with no effects on the other loci and telomeres analyzed. pAB704 (present in strains YAB1410 and YAB1706) is similar to pAB942 but carries an HO site; this plasmid will introduce a DSB at the ADH4 locus, with no consequences on cell cycle progression or replication timing of other loci, as the break is flanked by telomeric arrays.

**Table S2. List of oligonucleotides.**

| Oligo name | Purpose                                   | Name of target locus/template | Oligo sequence                                                                                        |
|------------|-------------------------------------------|-------------------------------|-------------------------------------------------------------------------------------------------------|
| DO1344     | QPCR                                      | Sp TEL (subtelomeric)         | TAATTTCTTTATTCAACTIACC CGCACATTC                                                                      |
| DO1348     | QPCR                                      | Sp TEL (subtelomeric)         | CAGTAGTGCAGGTGTAATATGATAATTAATAATGG                                                                   |
| DO2374     | QPCR                                      | Sp non-onf1                   | TTCAGGGCAAGAAGACTATTGG                                                                                |
| DO2375     | QPCR                                      | Sp non-onf1                   | CACATAACCCGGCTAGCTTCC                                                                                 |
| DO2391     | QPCR                                      | Sp 3or1333                    | AAAATGCCCTTGTGCTTTGTG                                                                                 |
| DO2392     | QPCR                                      | Sp 3or1333                    | GGCGATCGTCCAGAAATA                                                                                    |
| DO2393     | QPCR                                      | Sp 3or11283                   | GCAGAGCAGAAGITCAAAAG                                                                                  |
| DO2394     | QPCR                                      | Sp 3or11283                   | AACCAGATCTTCGGTGCAG                                                                                   |
| DO2395     | QPCR                                      | Sp ars727                     | CCCCAAAGGTACGAAAAAG                                                                                   |
| DO2396     | QPCR                                      | Sp ars727                     | TACTCATTTCCCCACCTCA                                                                                   |
| DO2401     | QPCR                                      | Sp AT2035                     | TGGTAGCTCGAGTGAGACACA                                                                                 |
| DO2402     | QPCR                                      | Sp AT2035                     | CACCTCCGGGAAGAGGTTAT                                                                                  |
| DO2406     | QPCR                                      | Sp cen1                       | TCAATTTCTGAAATTTTGTGTGC                                                                               |
| DO2407     | QPCR                                      | Sp cen1                       | AGGAAAGCCATGGAGTACA                                                                                   |
| DO2449     | QPCR                                      | Sp ars2004                    | GATTGACTCAGTACACACCACACA                                                                              |
| DO2451     | QPCR                                      | Sp ars2004                    | GCAATTTGATGGAAATTTGTT                                                                                 |
| DO2459     | QPCR                                      | Sp 2or1326                    | GGAAATCGAGCAGAGGTCAG                                                                                  |
| DO2460     | QPCR                                      | Sp 2or1326                    | TTGACGTTGTCTAAAAGGTG                                                                                  |
| DO2463     | QPCR                                      | Sp 2or14451                   | ACGATGTCATTTGGCACTCA                                                                                  |
| DO2464     | QPCR                                      | Sp 2or14451                   | AAAAATTTGGAACACTGCTTGT                                                                                |
| DO1230     | Deletion of Sp rrf1                       | pAB742                        | AAACTTTTGTGCAATTTTGGTGGATCGGTCCCATGAAGCTAAAAACAATTTTAAAAAGCATAACAGCTGATGTTGGGCACTCAACCCCTATCTCGG      |
| DO1231     | Deletion of Sp rrf1                       | pAB742                        | GAACCCCATTAATAAGATTGATTTATGACTAAATTTGACCCCAATGCCGGTCCGTAATTTCTGTACCCCATGAGTTGAATAACTCGAAATTAACCCCTCAC |
| DO2444     | genotyping of Sp rrf1-PP1                 | Sp rrf1                       | AACCTTCAACCCCATCATCA                                                                                  |
| DO2446     | genotyping of Sp rrf1-PP1/-12D/-7A/-7APP1 | Sp rrf1                       | CCTCGGGAAGACTTGGTGA                                                                                   |
| DO2502     | genotyping of Sp rrf1-12D/-7A/-7APP1      | Sp rrf1                       | GATCGGTCCCATGAAGCTAA                                                                                  |
| DO1135     | QPCR                                      | Sc TEL V1-R                   | CCATGACCCAGTCCCTCATTT                                                                                 |
| DO1136     | QPCR                                      | Sc TEL V1-R                   | TGGCAAGGTAATAAACCCAGT                                                                                 |
| DO1138     | QPCR                                      | Sc ARS607                     | CTTTAGCTGGGTTTATGGAGGTT                                                                               |
| DO2517     | QPCR                                      | Sc ARS607                     | TAATGACAGAGCCGAAACAA                                                                                  |
| DO1232     | QPCR                                      | Sc TEL XV-L                   | CCITACCTCCCACTCGTTAC                                                                                  |
| DO2518     | QPCR                                      | Sc TEL XV-L                   | ATCGTGTTCGGTGTGGTAT                                                                                   |
| DO2519     | QPCR                                      | Sc ARS522                     | AAGCAAATTCGAGAAGGTTATGAA                                                                              |
| DO2520     | QPCR                                      | Sc ARS522                     | TTCAGGCTCTAGCATATGAAACG                                                                               |
| DO2208     | QPCR                                      | Sc ARS1412                    | AAGCAAATTCGAGAAGGTTATGAA                                                                              |
| DO2209     | QPCR                                      | Sc ARS1412                    | TTCAGGCTCTAGCATATGAAACG                                                                               |
| DO998      | QPCR                                      | Sc ARS603                     | AATCCACCACAAAGCCCTAA                                                                                  |
| DO999      | QPCR                                      | Sc ARS603                     | CGAGGGTCGAAATCATCATC                                                                                  |
| DO373      | RIF1 C-terminal FLAG tagging              | pAB1090                       | ATTTATGATGAGGCTCGAATTAATCTCAACAGGGATATGATGAATCGGATCCCGGGGTTAATTTAA                                    |
| DO374      | RIF1 C-terminal FLAG tagging              | pAB1090                       | ATTGTAATTAATTTTGGCAATTTTGATCTATTCTACATACTAACAATCAGAATTCGAGCTCGTTTAAAC                                 |
| DO1734     | MCM4 C-terminal FLAG tagging              | pAB1090                       | TTGCTCTGGCGAGGGTGAAGGAGATCAGTTCGCCTGAATAACCGTTCGGGGGAGCGGGGGTGGGA                                     |
| DO1735     | MCM4 C-terminal FLAG tagging              | pAB1090                       | TTAGTATTTAATTAATTTGTTACCGAGGGGAATGATTTGTTAGTAGACAGCATCAGAAATTCGAGCTCGTCTTAAAC                         |
| DO2867     | Genotyping of Sc rrf1-PP1                 | Sc RIF1                       | AGGAAGCAGGCTAATGCAAA                                                                                  |
| DO2868     | Genotyping of Sc rrf1-PP1                 | Sc RIF1                       | ACTCTAAGCGCCGAGGATTT                                                                                  |
| DO1787     | PCR of ARS305 probe                       | ARS305                        | ATCGTGAAGCTGGGGTGAC                                                                                   |
| DO1788     | PCR of ARS305 probe                       | ARS305                        | GGCAAACGTCCTCAAGACAAT                                                                                 |
| DO2498     | PCR of ARS603 probe                       | ARS603                        | GGTATGCTGTTTTAAGTGAG                                                                                  |
| DO2499     | PCR of ARS603 probe                       | ARS603                        | CATAGATATCGGGTTACTAAAG                                                                                |

## Supplemental Experimental Procedures

### Strains and plasmids

All budding yeast strains were generated in the W303 background (*MAT $\alpha$*  *ade2-1 his3-11,15 leu2-3,112 trp1-1 ura3-1 can1-100 RAD5*). A complete list of the strains used is reported in Table S1. Standard budding yeast handling and growth conditions were used. Rich medium was YPAD, and drop-out media were made using pre-made mixes from United States Biological.

Fission yeast strains (containing *ade6-M216 ura4-D18 leu1-32 his3-D1* or combinations thereof) were grown in YES rich medium (Moreno et al., 1991) or YNG minimal medium (2% w/v glucose, 30 mM glutamate, 0.17% w/v YNB mix without amino acids ammonium sulphate or thiamine (United States Biological), 0.53% w/v SC dropout mix (United States Biological), 2% w/v agar, pH 6.0. Transformations were performed using a modified version of the protocol described by Bahler (Bahler et al., 1998): cells were incubated with plasmid DNA, carrier DNA and 40% PEG/LiAc/TE solution for 2 hrs at 30°C, before a 10 min heat shock at 42°C; transformations were subsequently plated out directly onto plates without centrifugation.

C-terminal 1xFlag-tagging of ScRif1 and ScMcm4 was obtained with PCR products generated from pFA6a-6xGLY-1xFLAG-kanMX6 (pAB1090) using oligos DO373/DO374 and DO1734/DO1735 respectively. Alternatively, ScRif1 was C-terminally 3xFlag-tagged using a MfeI-linearized plasmid containing the protein's C-terminus cloned in-frame to a triple Flag tag linked by an 8xGlycine linker (pAB1750). Sc *RIF1* gene deletions were obtained using plasmids pAB1511 (TRP1), pAB1655 (URA3), or pAB1749 (ADE2) linearized with SphI. Integration of the Sc *rif1-PP1* allele was obtained by transformation with pAB1654 linearized with SgrAI: colonies were then streaked on 5-FOA and genotyped by PCR with DO2267/DO2268 (314 bp product) followed by restriction enzyme digest with PstI or PvuII (PstI digestion: 314 bp on *RIF1*, 227 + 87 bp on *rif1-PP1*; PvuII digestion: 314 bp on *RIF1*, 146 + 90 + 78 bp on *rif1-PP1*). The *rif1-9D* allele was made in the same way as for *rif1-PP1* allele: SgrAI digested pAB1752 was used for the initial integration followed by FOA pop-out.

Genotyping was done by PCR using the same primers as for *rif1-PP1* (DO2267/DO2268) and digested with AgeI (*RIF1*: 253 + 61 bp, *rif1-9D*: uncut).

To obtain the Sp *rif1-PP1* allele, the same procedure was used using plasmid pAB1664 linearized with BglII. SacI digestion of a 360 bp PCR product made with DO2444/DO2446 on genomic DNA indicated the presence of the allele (237 + 123 bp in *rif1-PP1*; uncut in WT). To obtain the *rif1-12D/-7A/-7APP1* alleles, BglII-linearized plasmids (pAB1741, 1740, 1742 respectively) containing the mutated region and a *ura+* marker were transformed into yeast. The resultant colonies were counter-selected on 5'-fluoroorotic acid (5'-FOA) to select for recombination at the Sp *rif1* locus. Fission yeast strains with mutations in putative CDK/DDK phosphorylation sites were verified by PCR using DO2502/DO2446 which results in a 462 bp product. DraIII cleaves *rif1-7A* and *rif1-7APP1* but not *rif1-12D* PCR products to give 260 + 202 bp fragments, while ApeI cleaves *rif1-7A* and *rif1-12D* to give 176, 175 and 111bp fragments, and *rif1-7APP1* to give 287 + 175 bp fragments. All Rif1 mutant alleles were generated by gene synthesis (Eurofins). The C-terminus of Sp Rif1 was tagged with 10xMyc epitopes using pAB1462 or pAB1744 linearized with MfeI. Sp *rif1+* was deleted using a PCR product made with oligonucleotides DO1230/DO1231 on using pSVEM-bsd (pAB742) as template (Erlar et al., 2006). Fission yeast strains with deletions of *sds21+* or *dis2+*, or with N-terminal EGFP-tags of the same genes expressed from their chromosomal locus were kindly gifted by Iain Hagan. The *hsk1-89* strain was gratefully received from Tony Carr.

### **Immunoprecipitation of ScRif1**

Cultures of exponentially growing budding yeast cells (100 ml of  $1 \times 10^7$  cells/ml) were lysed in 15 mM Hepes pH 7.6, 150 mM NaCl, 0.5 % NP-40 with three 20 s pulses in a Beadbeater. The lysate was clarified by centrifugation and the supernatant was incubated first with anti-myc 9E10 monoclonal antibody for 2 hours at 4°C and then with Protein G Dynabeads for 1 hour at 4°C. Bound proteins (eluted by boiling in Laemmli buffer) and input samples were separated on a 8% (top panel) and 10% (bottom panel) SDS gel and Western blotting was performed using anti-Flag (M2, Sigma) or anti-Myc antibody (homemade 9E10).

## **Immunoprecipitation of SpRif1**

Whole cell extracts from  $2 \times 10^8$  fission yeast were prepared by resuspending in 500  $\mu$ l of chilled lysis buffer (50 mM NaCl, 50 mM Tris pH 7.5, 10% glycerol, 4 mM B-mercaptoethanol, 1 mM EDTA) containing 1 complete protease inhibitor tablet (Roche) per 7 ml of buffer. Following lysis in a beadbeater for 3 min, 1  $\mu$ l Benzonase Nuclease (Novazyme) and 50  $\mu$ l 10% NP40 were added to the lysate and incubated for 30 min on ice. After centrifugation for 10 min, 30  $\mu$ l of the cleared lysate was boiled with 10  $\mu$ l 4x Laemmli buffer and kept aside as Input. Protein G Dynabeads (Invitrogen) were blocked for 30 min in lysis buffer + 5% BSA. 25  $\mu$ l of the beads were used to pre-clear the remaining lysate for 30 min at 4°C on a rotating wheel. 1  $\mu$ l rabbit anti-GFP antibody (Invitrogen) was added to the supernatant obtained after magnetic separation of the beads. The samples were then incubated with rotation at 4°C for 1 hr. 25  $\mu$ l of Dynabeads were added before further incubation at 4°C for 2 hrs. Following magnetic separation and removal of the supernatant, the beads were resuspended in 40  $\mu$ l 1x Laemmli buffer and boiled for 5 min.

## **Synchronization of budding yeast cultures**

Budding yeast cells were grown in 100 ml overnight cultures in the appropriate drop-out SC medium containing 4% raffinose. The cultures were then diluted into 300 ml of YPA 4% raffinose and grown for 2 hours with 0.025  $\mu$ M  $\alpha$ -factor to arrest the cells in G1 phase of the cell cycle. Cells at a density of  $1 \times 10^7$  cells/ml were then switched to YPA 4% galactose for 4 hours at 30°C, while maintaining the arrest with 0.025  $\mu$ M  $\alpha$ -factor. Cells were released into S-phase by washing twice with water and switching the cells to YPA+GAL containing 0.125 mg/ml pronase at 18°C.

## **Quantification of budding and fission yeast DNA**

Fission yeast strains containing the *cdc25-22* allele were grown to mid-log-phase at 25°C, arrested in G2 for 3h at 36°C and subsequently released into medium containing 25 mM HU at 25°C for 140 min. Samples were collected for G2-arrested cells and S-phase-arrested cells (140 min in HU) by cross-linking cells in 1% formaldehyde.

Budding yeast strains were synchronized as described above and samples collected after crosslinking in 1% formaldehyde.

For both yeasts, cell were lysed on a BeadBeater and centrifuged. Pellets were then resuspended in 500  $\mu$ l CHIP Lysis buffer (50 mM HEPES pH 7.5, 140 mM NaCl, 1 mM EDTA, 1% Igepal CA-630, 0.1% sodium deoxycholate) and sonicated 15 x 30 sec on high in a Diagenode Bioruptor. 10  $\mu$ l of the supernatant collected after centrifugation was added to 110  $\mu$ l TES (20 mM Tris-Cl pH7.5, 1 mM EDTA, 1% SDS) and de-crosslinked overnight at 65°C. DNAs were purified using the Qiagen PCR purification kit.

## **ChIP**

ChIP was performed as described previously (Bianchi and Shore, 2007). Briefly, after cross-linking in 1% formaldehyde, cells were lysed and sonicated to achieve DNA fragments <500 bp. Immunoprecipitations were carried out with anti-Myc 9E10 (supernatant from a 9E10 hybridoma cell-line) or anti-GFP (Invitrogen) and ProteinG Dynabeads (Invitrogen) against N- or C-terminally tagged proteins, as indicated. Both an aliquot of sonicated cleared extract (input) and the immunoprecipitated material were de-cross-linked in TE plus 1% SDS at 65°C overnight. Quantitation of immunoprecipitated DNA was obtained by real-time PCR using SYBR Green detection on a Roche Light Cycler 480 II instrument and expressed either as percent of starting (input) material or as fold-enrichment over a control locus (Pfaffl, 2001). Primers used are listed in Table S2.

## **Protein analysis by Western blotting**

Protein extracts were made using asynchronous cultures by lysing cells using 0.5 mm glass beads and 200  $\mu$ l 20% TCA in a Bead-Beater. Next, lysates were added to 400  $\mu$ l 5% TCA. Cells were then pelleted and resuspended in 200  $\mu$ l Laemmli sample buffer (250 mM TrisCl pH7.5, 2% SDS, 5% Glycerol, 0.1% BromoPhenol Blue, 2.5%  $\beta$ -mercaptoethanol) and boiled at 95°C for 5min. The samples were then separated on SDS-PAGE gel of required percentage and western blotting was

performed. The proteins were visualized by treating the membrane with ECL and imaged using a LAS 4000 instrument (GE).

### **Analysis of Mcm4 phosphorylation**

Budding yeast cells were grown in 5 ml overnight cultures in YPAD at 25°C (wild-type, *rif1-Δ*, *rif1-PP1*, *cdc7-1*, *cdc7-1 rif1-Δ*, *cdc7-1 rif1-PP1*). The cultures were then diluted to  $0.4 \times 10^7$  cells/ml in 10 ml YPAD and were grown at 25°C for one cell cycle to obtain a log phase culture. 2.4 μM α-factor was added to arrest the cells in G1 phase of the cell cycle at either 25°C or 37°C for 1 hour. After 1 hour the cells were pelleted and resuspended in fresh 10 ml YPAD with 2.4 μM α-factor and incubated for another hour at the respective temperatures. After a total of 2 hours the cells were harvested and were resuspended in 600 μl 100%TCA and were kept on ice for 10 minutes. The cells were pelleted by centrifuging at 3000 rpm for 2 minutes, followed by two acetone washes. The pellets were then dried under vacuum and were resuspended in 100 μl Urea buffer (50 mM Tris-Cl pH 7.5, 5 mM EDTA, 6 M Urea, 1% SDS). 200 μl 0.5 mm glass beads were added to the tubes and the cells were lysed in a bead beater 5 times for 45 seconds with 1 min on ice in between. The extracts were incubated at 65°C for 10 minutes and centrifuged at 14000 rpm for 10 minutes before the addition of 200 μl of 2x Laemmli buffer. Samples were boiled for 5 min and separated on 6% SDS-PAGE gel.

### **Alkaline gels**

DNA replication intermediates were analyzed using alkaline agarose gel electrophoresis. Briefly, DNA was prepared by lysing  $1 \times 10^8$  cells using zymolyase 100T (USB) extraction method and the DNA was then separated on a 1% denaturing alkaline gel (50 mN NaOH, 1 mM EDTA). Southern blotting was then performed and the DNA was probed with <sup>32</sup>P-labelled ARS305 probe and ARS603 probe. Probes were generated by PCR using oligos DO1787/1788 and DODO2498/DO2499.

### **FACS analysis**

Cells were fixed in 70% ethanol and treated with 200 μg/ml RNase. Cells were then stained



with 10 µg/ml Propidium Iodide (PI) before being analyzed in 50 mM Na citrate 10 µg/ml PI on a Becton Dickinson FACScalibur flow cytometer with CellQuest software.

## Supplemental References

Bahler, J., Wu, J.Q., Longtine, M.S., Shah, N.G., McKenzie, A., 3., Steever, A.B., Wach, A., Philippsen, P., and Pringle, J.R. (1998). Heterologous modules for efficient and versatile PCR-based gene targeting in *Schizosaccharomyces pombe*. *Yeast* 14, 943-951.

Bianchi, A., and Shore, D. (2007). Early replication of short telomeres in budding yeast. *Cell* 128, 1051-1062.

Erler, A., Maresca, M., Fu, J., and Stewart, A.F. (2006). Recombineering reagents for improved inducible expression and selection marker re-use in *Schizosaccharomyces pombe*. *Yeast* 23, 813-823.

Moreno, S., Klar, A., and Nurse, P. (1991). Molecular genetic analysis of fission yeast *Schizosaccharomyces pombe*. *Methods Enzymol* 194, 795-823.

Pfaffl, M.W. (2001). A new mathematical model for relative quantification in real-time RT-PCR. *Nucleic Acids Res* 29, e45.
